# Supplementary material
Source: PubMed Central journal article supplement (PMC4380535)
Supplement: NIHMS652052-supplement-supplement_1.pdf [file NIHMS652052-supplement-supplement_1.pdf]

Supplemental Table 1. Food items included on the Bone Mineral Density in Childhood Study calcium food frequency questionnaire

|                                                                    |                                                                          |
|--------------------------------------------------------------------|--------------------------------------------------------------------------|
| <b><u>Grains</u></b>                                               | Mixed dish with beef (beef and noodles, hamburger helper, stew, etc.)    |
| Cold cereal                                                        | Spaghetti, ravioli, or lasagna                                           |
| Hot cereal                                                         | Macaroni and cheese                                                      |
| Pancakes, waffles, or French toast                                 | Pizza or pizza pockets                                                   |
| Granola bars or breakfast bars                                     | <b><u>Vegetables</u></b>                                                 |
| Bread                                                              | Baked beans, refried beans, pinto beans, or red Mexican beans            |
| Cornbread, corn muffin, or corn tortillas                          | Greens including spinach, mustard greens, or collards                    |
| Flour tortillas                                                    | Vegetable soup, tomato soup, or cream soup                               |
| Biscuits or muffins                                                | Potatoes including French fries, tater tots, or mashed or baked potatoes |
| Hamburger buns, hot dog buns, or bagels                            | <b><u>Beverages</u></b>                                                  |
| Stuffing                                                           | Soda pop, any type                                                       |
| Rice                                                               | Fruit flavored drinks such as Sunny delight, Kool-Aid, or Hi-C           |
| <b><u>Dairy</u></b>                                                | Orange juice (queried calcium fortification)                             |
| Milk                                                               | Other fruit juices (queried calcium fortification)                       |
| Milk on cereal                                                     | Instant breakfast milkshakes such as Carnation, Slimfast, or Ensure      |
| Cheese                                                             | Milkshakes                                                               |
| Nachos with cheese                                                 | <b><u>Other</u></b>                                                      |
| Yogurt                                                             | Eggs                                                                     |
| Sour cream                                                         | Sausage                                                                  |
| Ice cream or frozen yogurt                                         | Gravy                                                                    |
| <b><u>Combination foods</u></b>                                    | Potato chips or other salty snacks                                       |
| Hamburgers or cheeseburgers                                        | Cookies                                                                  |
| Hot dogs or corn dogs                                              | Cake or cupcakes                                                         |
| Tacos or burritos                                                  | Pudding                                                                  |
| Mixed dish with chicken (chicken and gravy, chicken pot pie, etc.) | Chocolate candy                                                          |
| Fish, fish sandwiches, or fish sticks                              |                                                                          |

Supplemental Table 2. Regression calibration model for natural log transformed calcium intake

|                                             | Intercept                     | FFQ<br>calcium <sup>b</sup>   | Age                           | Male                          | Black                         | Hispanic                      | Other                         | Height                       | Physical<br>activity |
|---------------------------------------------|-------------------------------|-------------------------------|-------------------------------|-------------------------------|-------------------------------|-------------------------------|-------------------------------|------------------------------|----------------------|
| All subjects ( <i>n</i> = 363) <sup>a</sup> | 6.894<br>(0.102)              | 0.307<br>(0.037)              | 0.001<br>(0.01)               | 0.057<br>(0.045)              | -0.137<br>(0.056)             | -0.057<br>(0.071)             | -0.088<br>(0.072)             | 0.004<br>(0.003)             | 0.002<br>(0.003)     |
|                                             | Tanner 2<br>-0.004<br>(0.129) | Tanner 3<br>-0.081<br>(0.127) | Tanner 4<br>-0.017<br>(0.121) | Tanner 5<br>-0.202<br>(0.134) | Center A<br>-0.019<br>(0.077) | Center B<br>-0.132<br>(0.079) | Center D<br>-0.003<br>(0.066) | Center E<br>-0.02<br>(0.073) |                      |

Abbreviations: FFQ, food frequency questionnaire.

Notes: Values are the conditional mean and (standard error) obtained by regressing the average of the three 24-h recalls on the FFQ + covariates.

<sup>a</sup>The intercept represents the value for a participant at the mean of calcium intake (6.6 mg/d), age (13.1 y), and height (150.1 cm), who is female, Non-Hispanic white, tanner stage 1, reported engaging in no physical activity, and enrolled at clinical site C.

<sup>b</sup>Attenuation factor (calibration coefficient).
